# Supplementary material for: TIGAR contributes to ischemic tolerance induced by cerebral preconditioning through scavenging of reactive oxygen species and inhibition of apoptosis
Source: PubMed Central journal article supplement (PMC4891774; doi:10.1038/srep27096), 2016-06-03

## Supplementary Information

### **TIGAR contributes to ischemic tolerance induced by cerebral preconditioning through scavenging of reactive oxygen species and inhibition of apoptosis**

Jun-Hao Zhou<sup>1</sup>, Tong-Tong Zhang, Dan-Dan Song, Yun-Fei Xia, Zheng-Hong Qin,  
and Rui Sheng\*

<sup>1</sup>Department of Pharmacology and Laboratory of Aging and Nervous Diseases,  
Soochow University School of Pharmaceutical Science, Suzhou, China

\*Corresponding author:

Rui Sheng, PhD

Department of Pharmacology and Laboratory of Aging and Nervous Diseases,  
Soochow University School of Pharmaceutical Science, Suzhou, China

199 Ren Ai Road, Suzhou 215123

Phone Number: 86-512-65882071

Fax Number: 86-512-65882071

Email: sheng\_rui@163.com

**Supplementary Figure 1.** TIGAR deficiency caused the downregulation of Bcl-2/Bax under ISO+OGD treatment. The neurons were infected with LV-sh-TIGAR or LV-shNC at DIV2. The neurons were subjected to OGD for 4 h at 24 h after IPC treatment. The cells were harvested at 3h after reperfusion and subjected to Western blot analysis. (A) TIGAR knockdown reduced the expression of Bcl-2. (B) TIGAR knockdown increased the expression of Bax. Bar represents mean  $\pm$ SD, n=3 independent experiments. \*\*  $P < 0.01$  compared with the control group. \$  $P < 0.05$ , \$\$  $P < 0.01$  compared with the ISO+OGD group, &  $P < 0.05$  compared with NC+ISO.

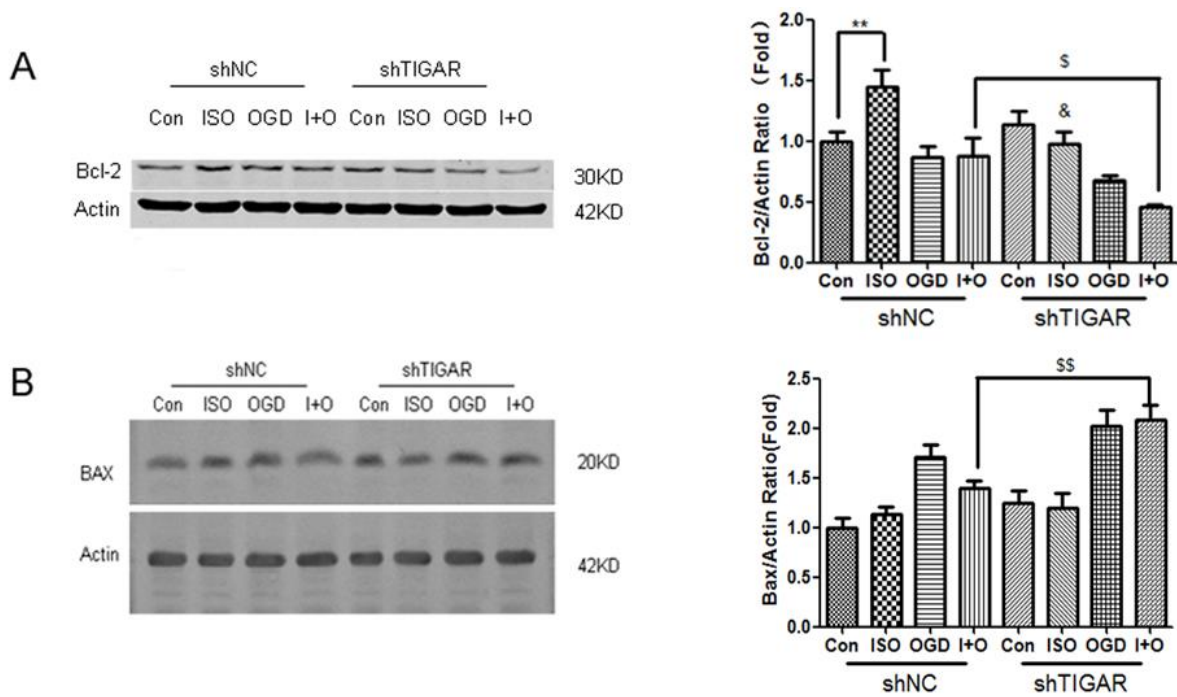

Supplement: srep27096-s1.pdf [file srep27096-s1.pdf]
